# Supplementary material for: Drainage Alternatives for Rain Gardens on Subsoil of Low Permeability: Balance among Ponding Time, Soil Moisture, and Runoff Reduction
Source: Atypon-hosted journal article supplement (doi:10.1061/jswbay.0000988), 2022-04-21
Supplement: supplemental_materials_jswbay.0000988_zhou.pdf [file supplemental_materials_jswbay.0000988_zhou.pdf]

## SUPPLEMENTAL MATERIALS

*ASCE Journal of Sustainable Water in the Built Environment*

# Drainage Alternatives for Rain Gardens on Subsoil of Low Permeability: Balance among Ponding Time, Soil Moisture, and Runoff Reduction

Zikai Zhou and Qizhong Guo

**DOI:** 10.1061/JSWBAY.0000988

© ASCE 2022

[www.ascelibrary.org](http://www.ascelibrary.org)

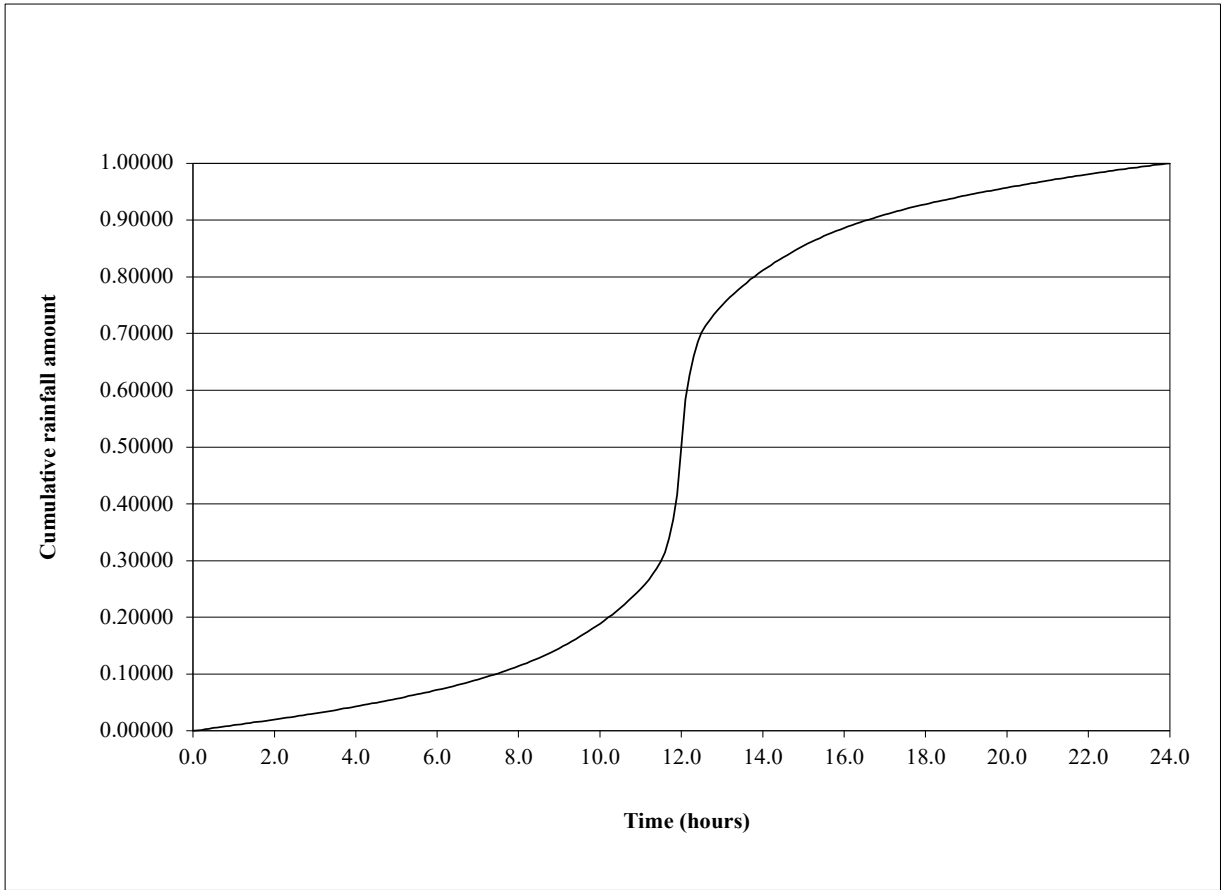

**Fig. S1. NRCS type III 24-hour rainfall storm distribution**

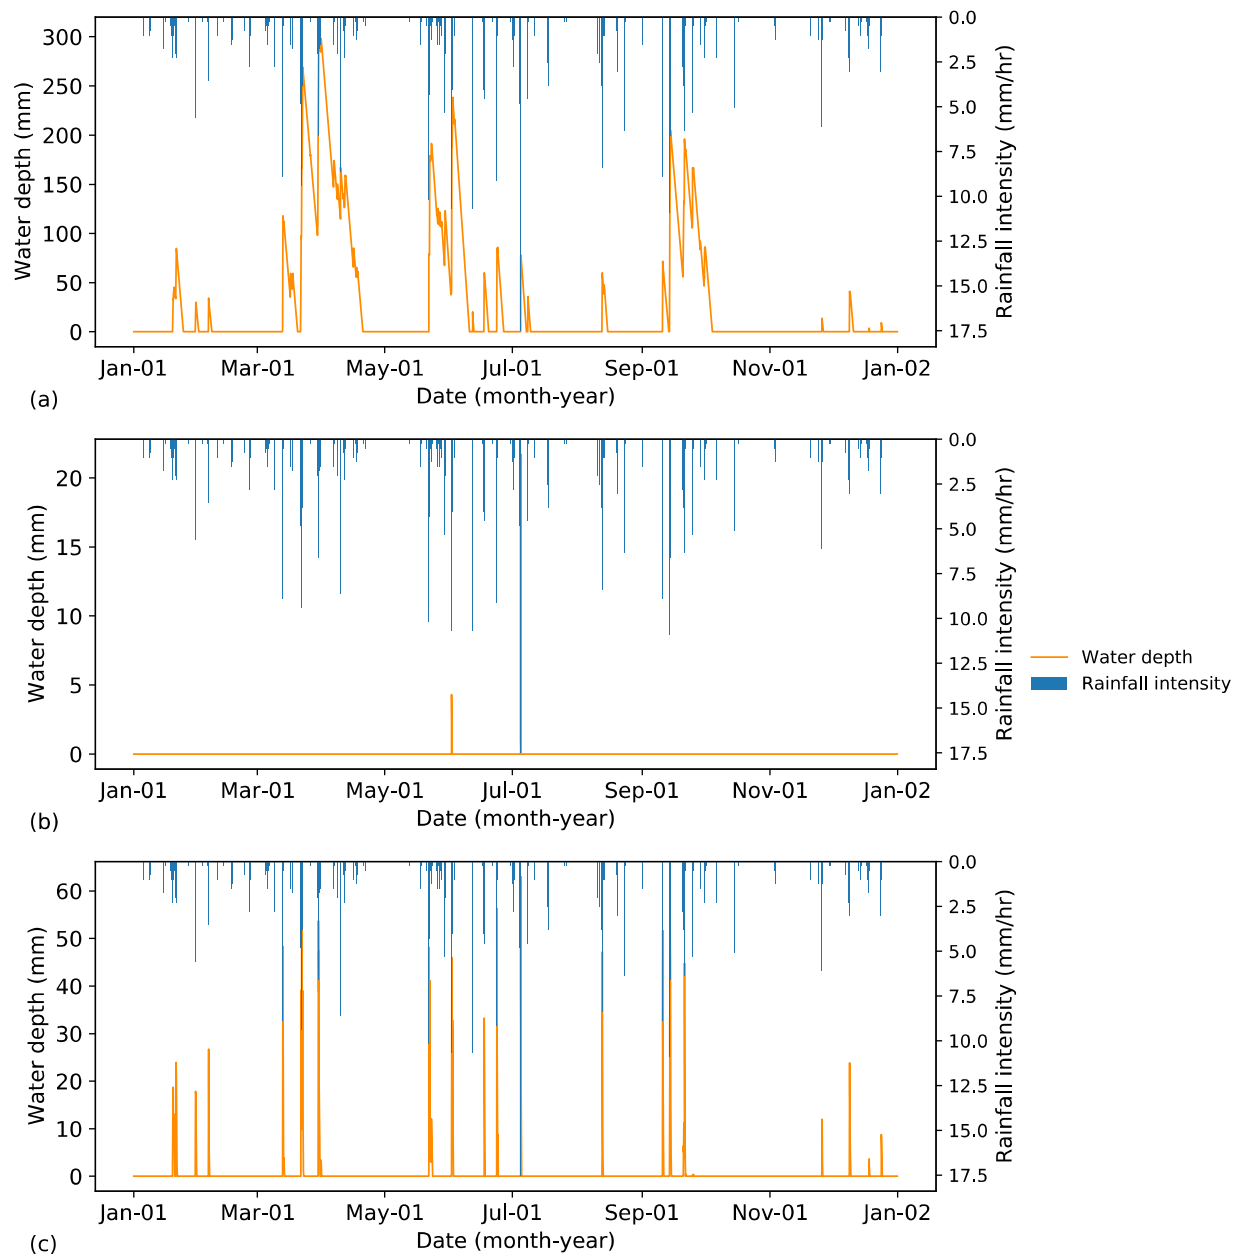

**Fig. S2. Standing water depth over an entire year 2001 for each drainage design: (a) no drain; (b) underdrain (25.4 mm/hr); (c) surface drain (63.5 mm)**



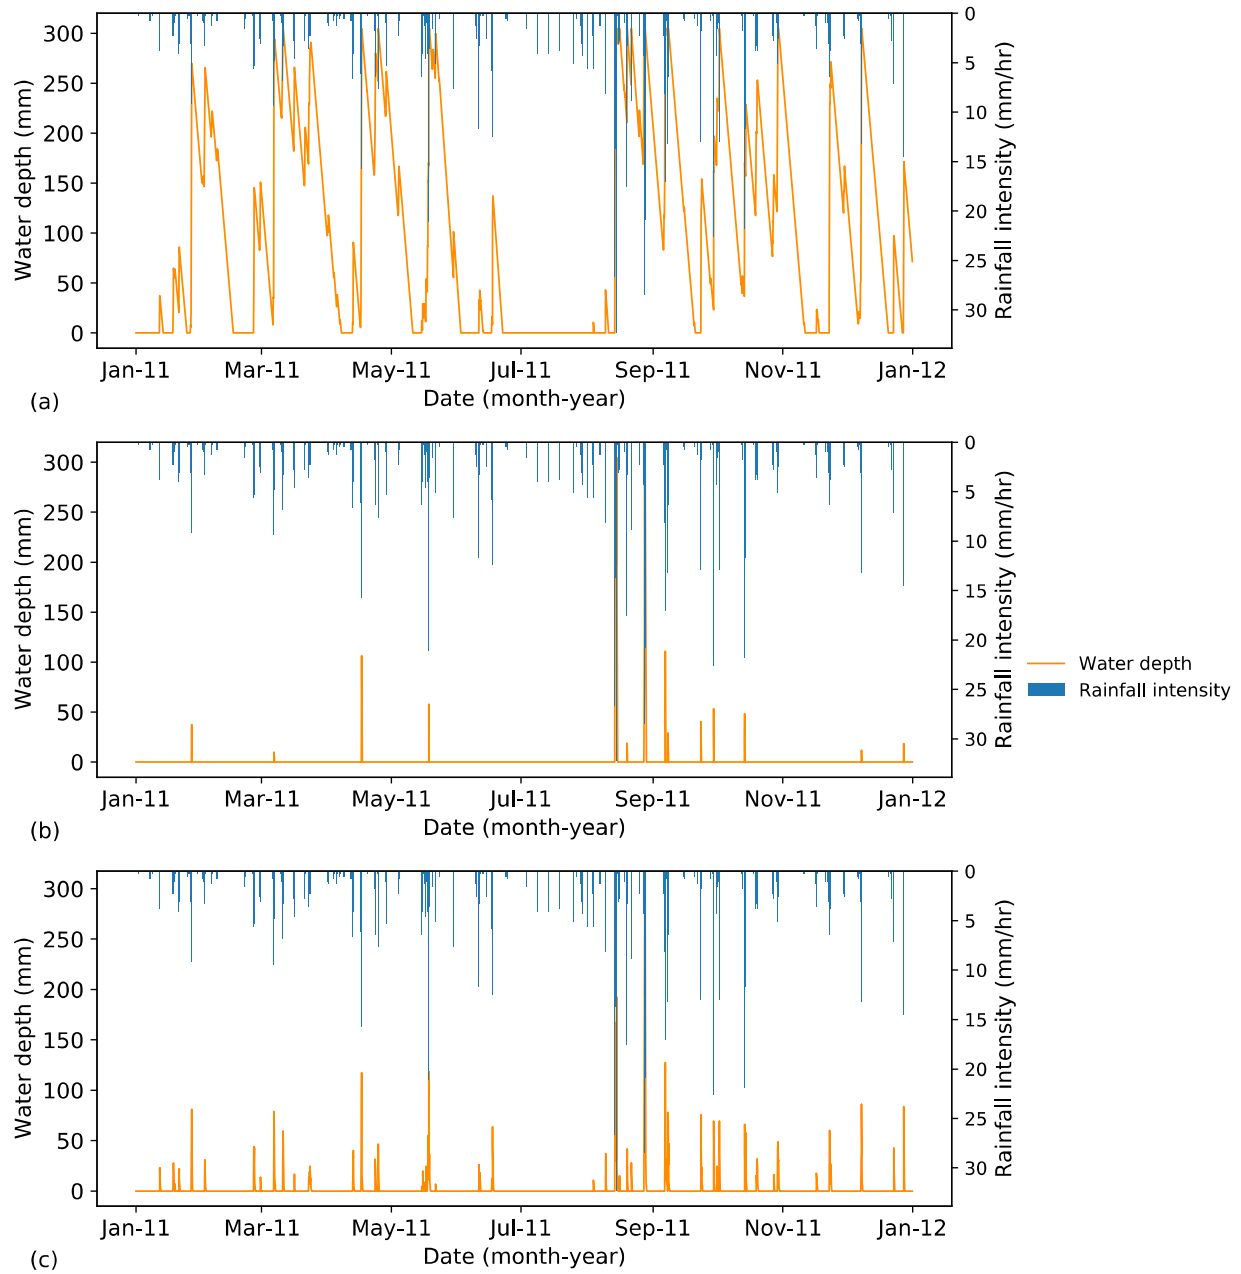

**Fig. S4. Standing water depth over an entire year 2011 for each drainage design: (a) no drain; (b) underdrain (25.4 mm/hr); (c) surface drain (63.5 mm)**

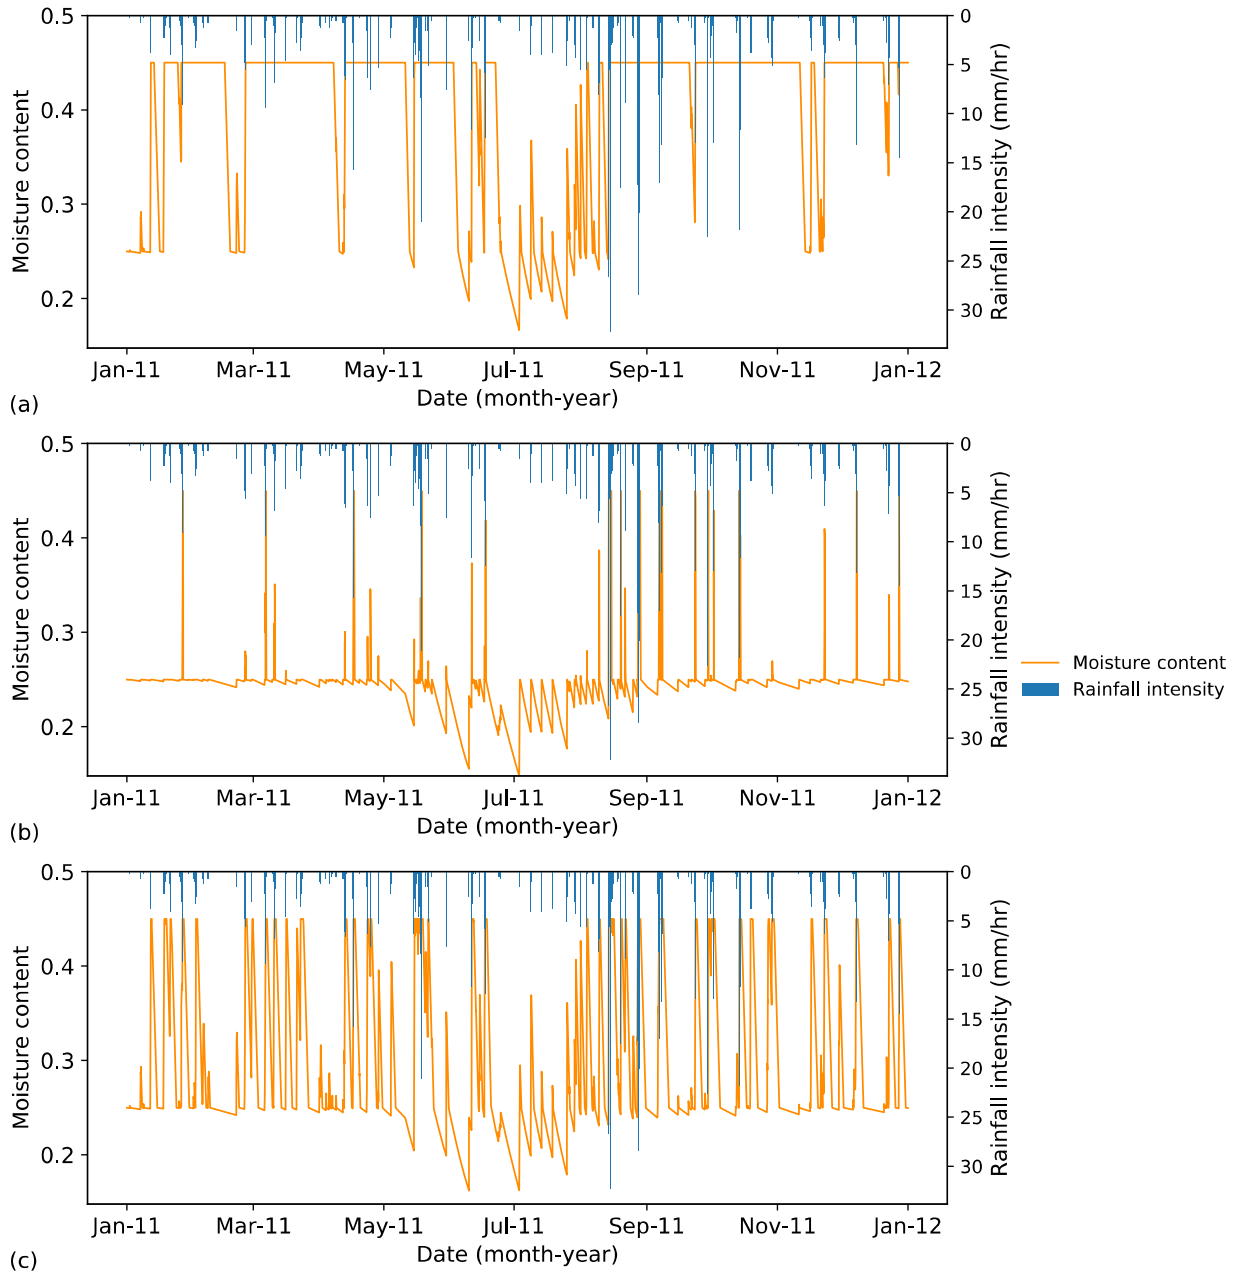

**Fig. S5. Soil moisture content and rainfall intensity over an entire year 2011 for each drainage design: (a) no drain; (b) underdrain (25.4 mm/hr); (c) surface drain (63.5 mm)**

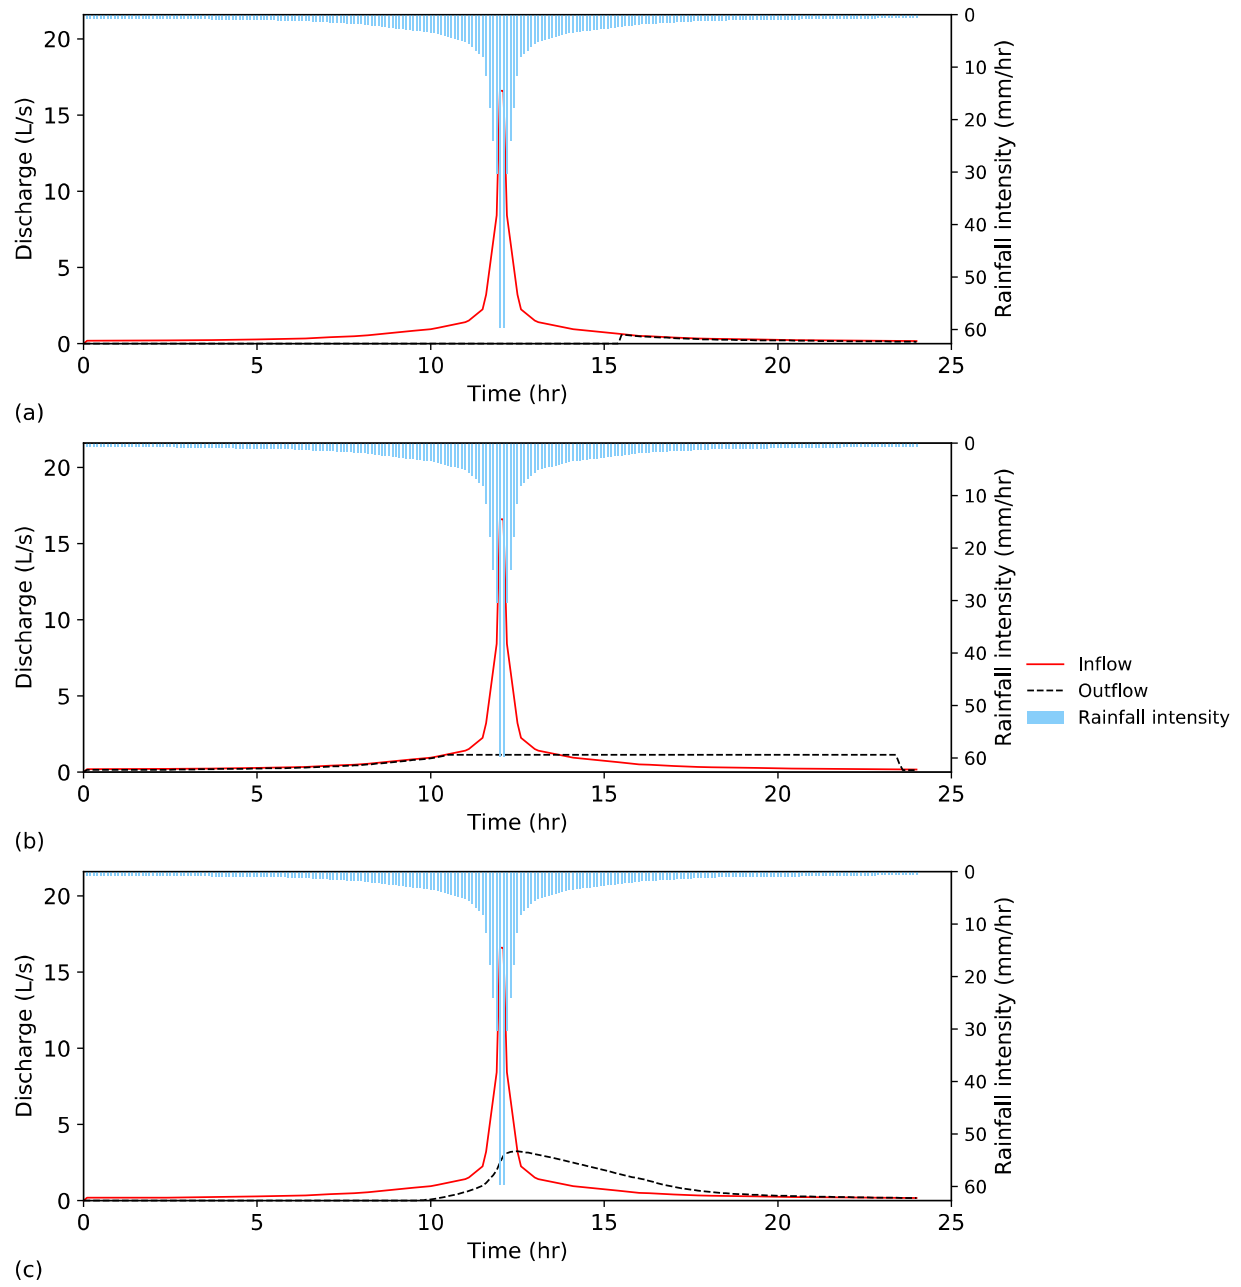

**Fig. S6. Inflow and outflow hydrographs at 1-year storm for each drainage design: (a) no drain; (b) underdrain design (25.4 mm/hr); (c) surface drain design (63.5 mm)**

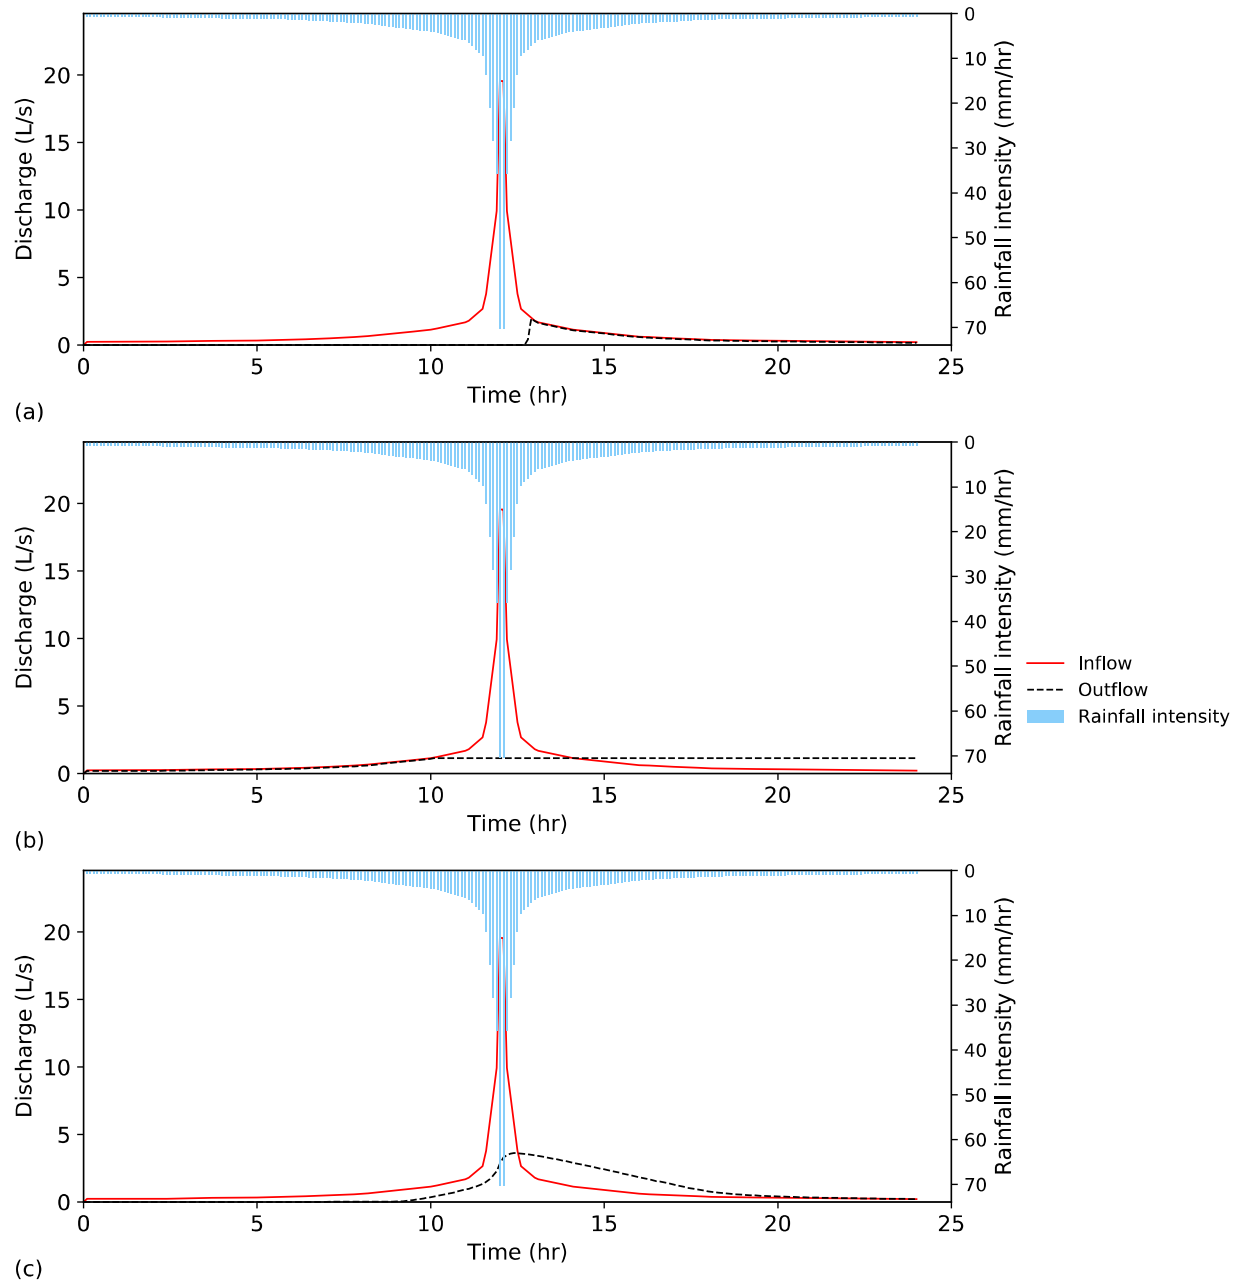

**Fig. S7. Inflow and outflow hydrographs at 2-year storm for each drainage design: (a) no drain; (b) underdrain design (25.4 mm/hr); (c) surface drain design (63.5 mm)**



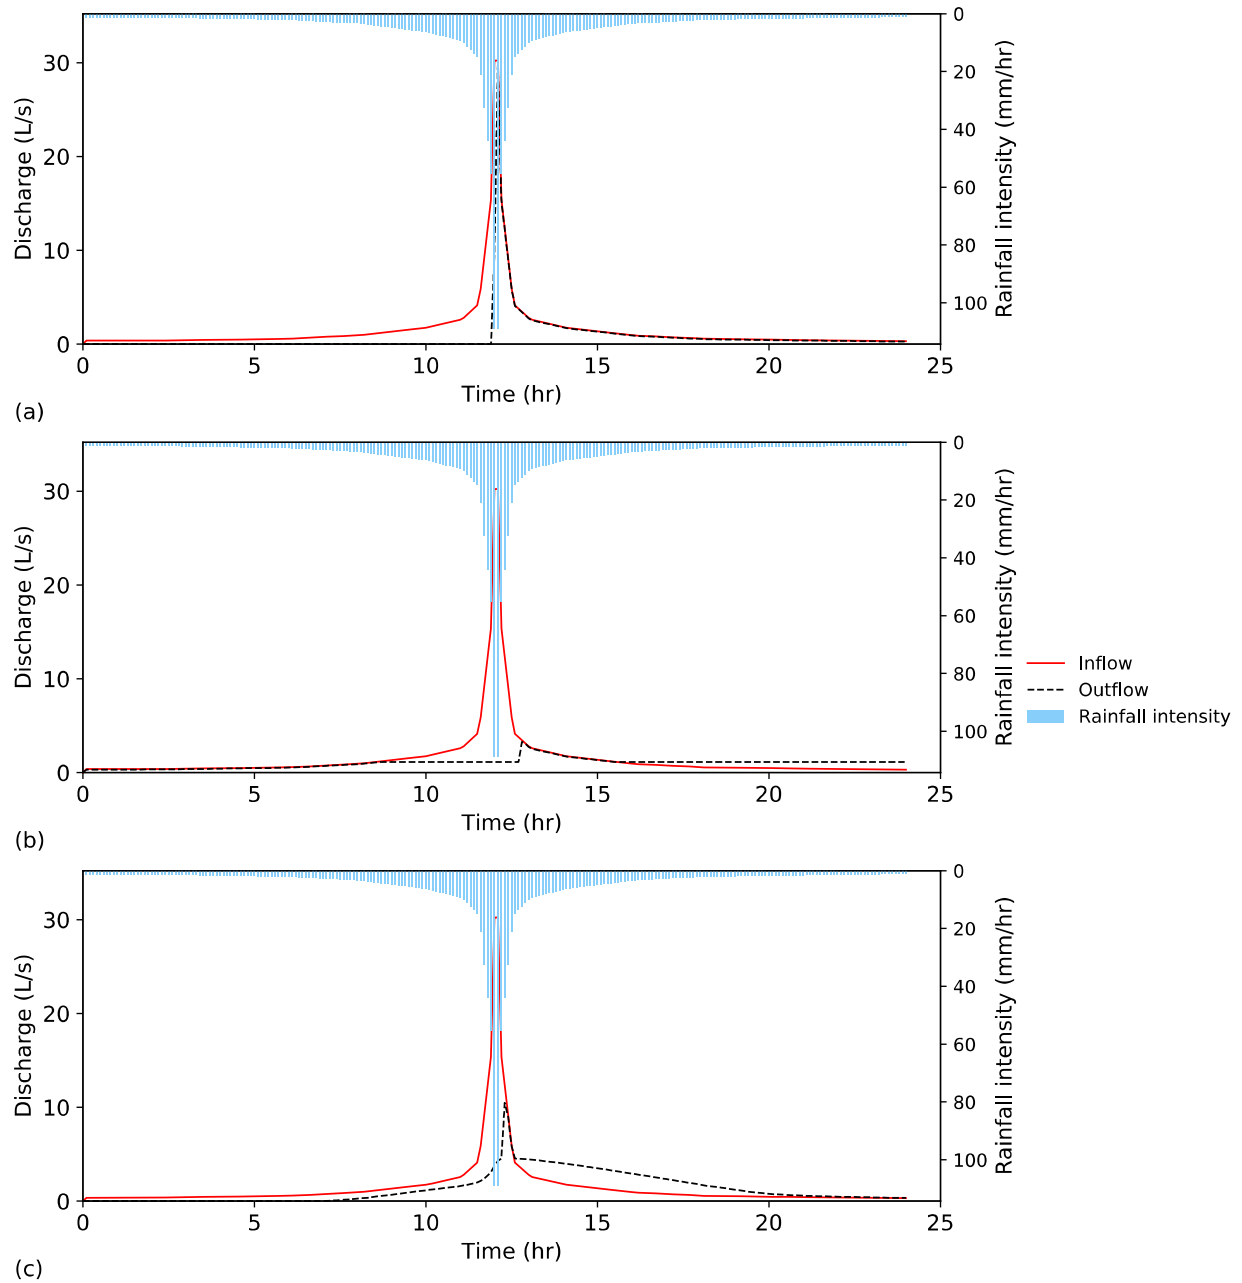

**Fig. S8. Inflow and outflow hydrographs at 10-year storm for each drainage design: (a) no drain; (b) underdrain design (25.4 mm/hr); (c) surface drain design (63.5 mm)**

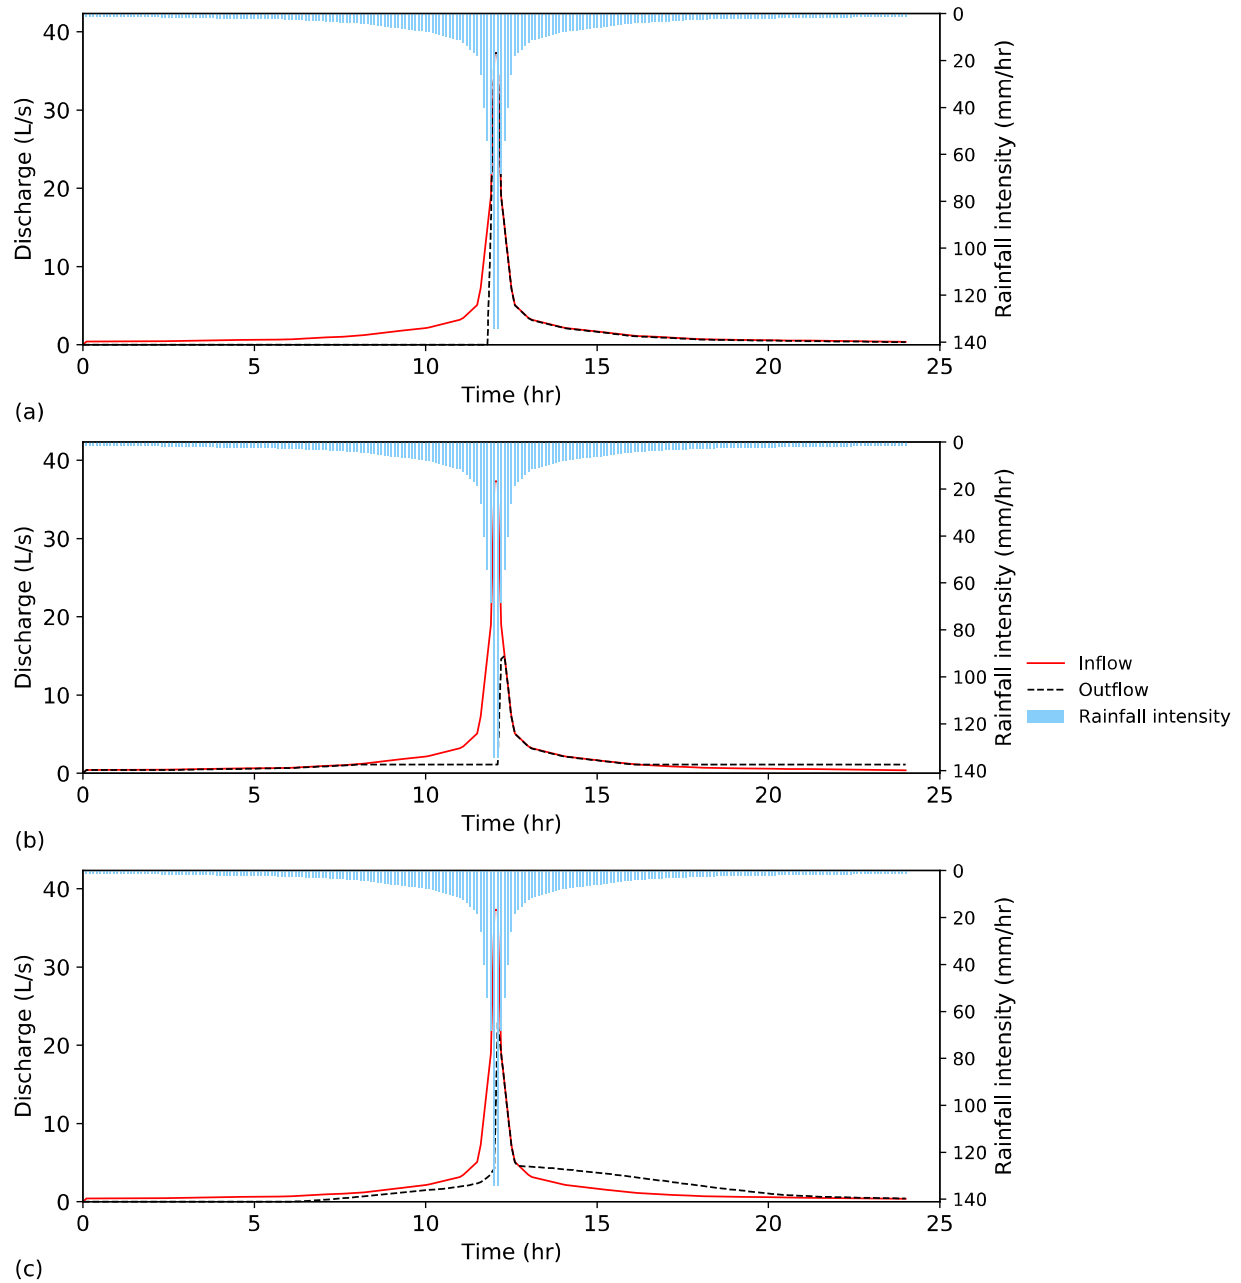

**Fig. S9. Inflow and outflow hydrographs at 25-year storm for each drainage design: (a) no drain; (b) underdrain design (25.4 mm/hr); (c) surface drain design (63.5 mm)**

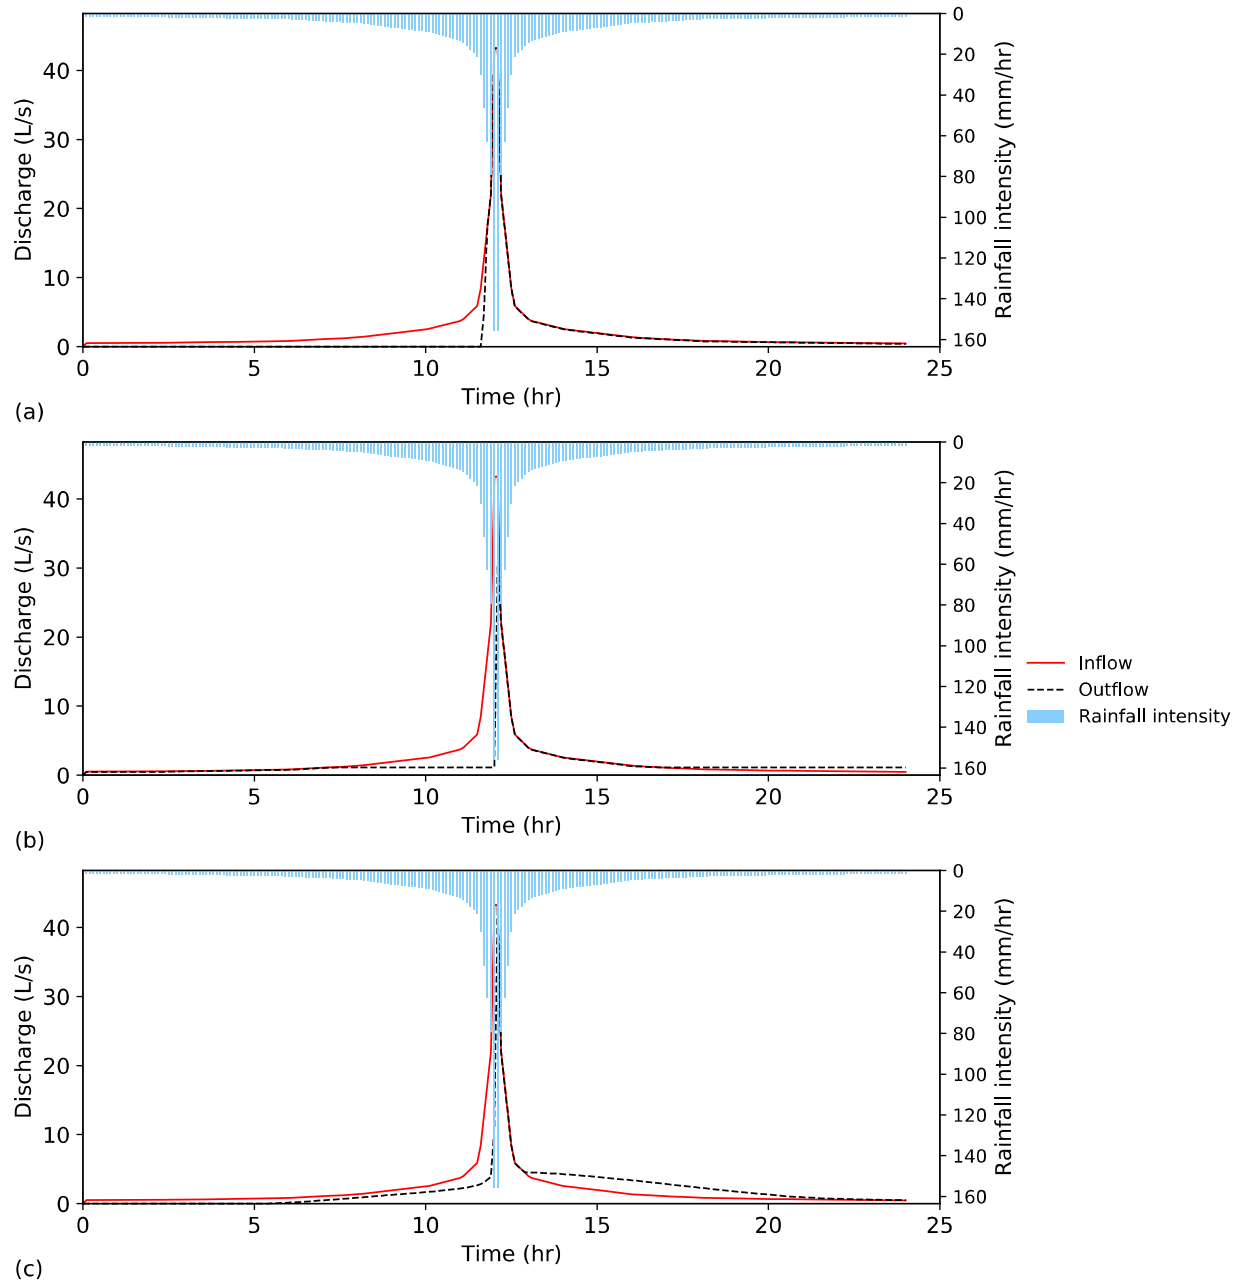

**Fig. S10. Inflow and outflow hydrographs at 50-year storm for each drainage design: (a) no drain; (b) underdrain design (25.4 mm/hr); (c) surface**

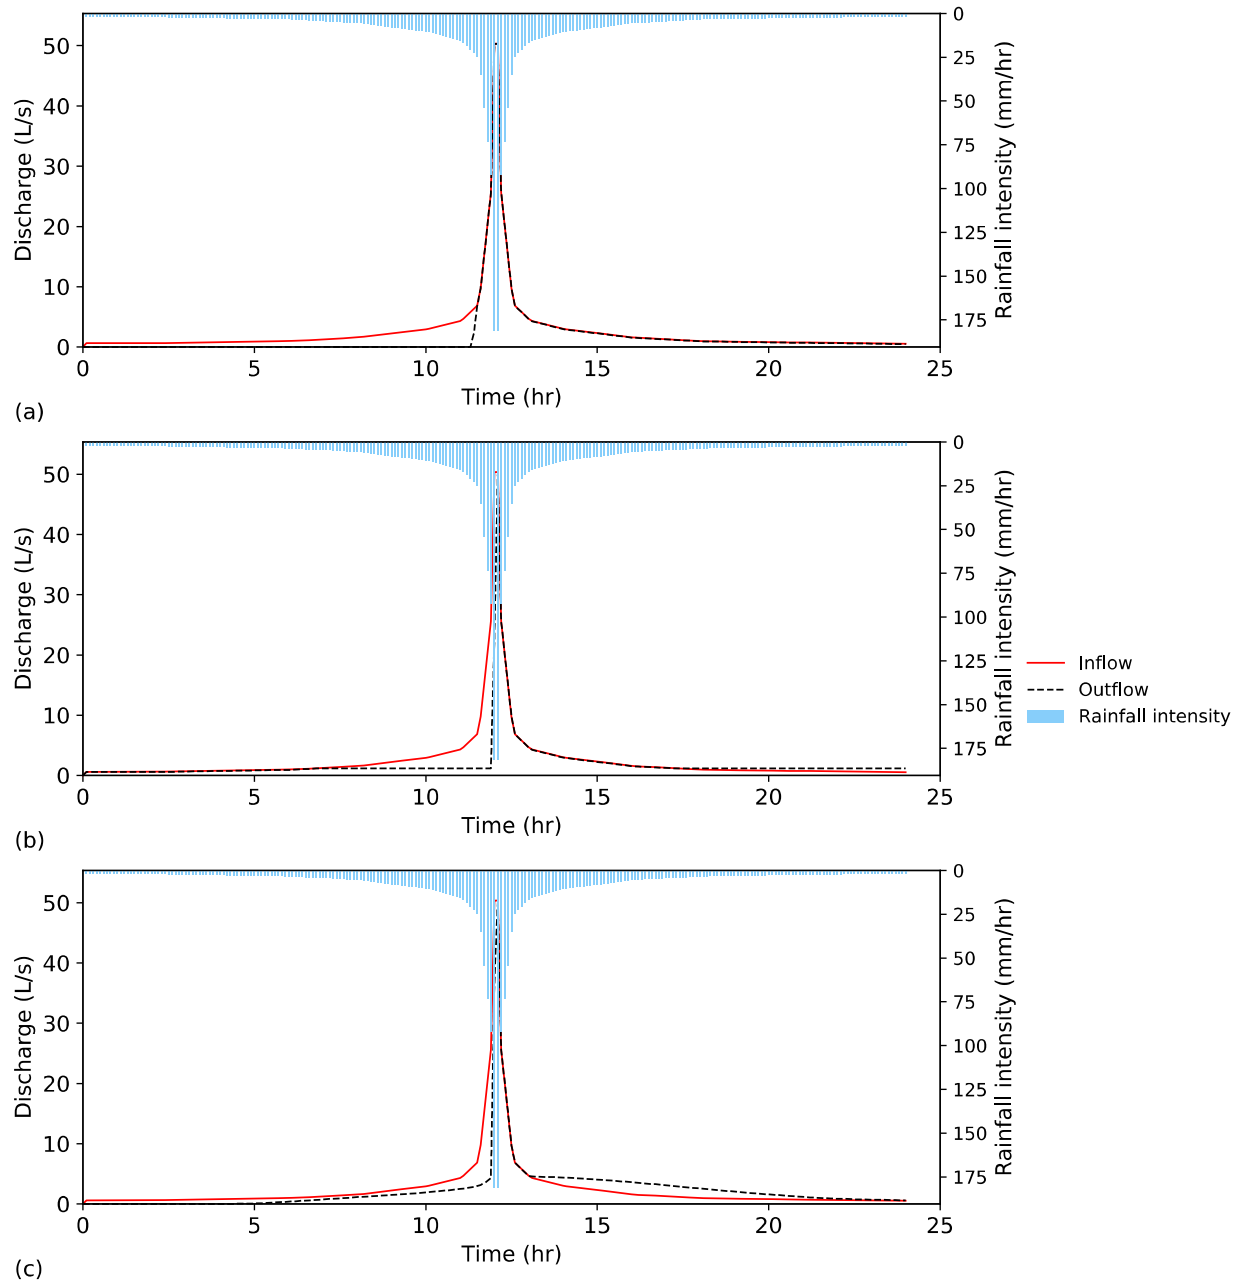

**Fig. S11. Inflow and outflow hydrographs at 100-year storm for each drainage design: (a) no drain; (b) underdrain design (25.4 mm/hr); (c) surface**
